# Supplementary material
Source: MDPI journal article supplement (https://www.mdpi.com/2076-3417/11/17/8264)
Supplement: s1 [file s1]

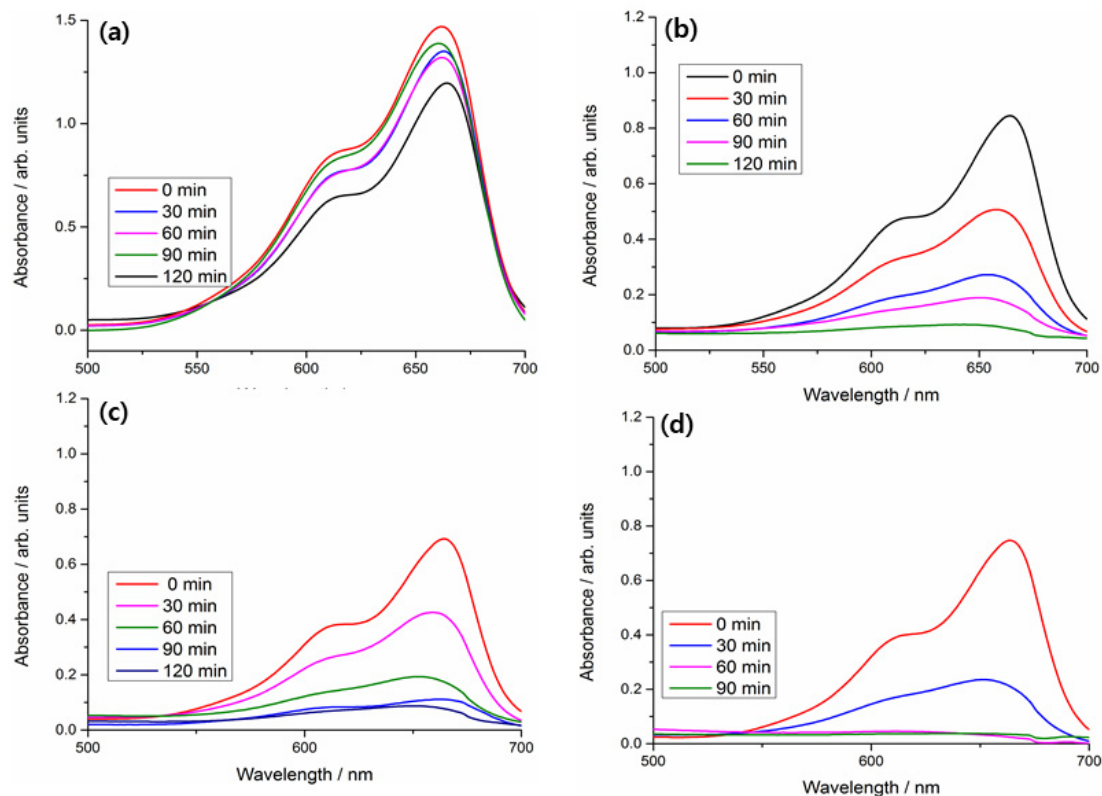

Figure S1. UV Vis absorption spectra for the dye degradation employing (a) Pure  $\text{TiO}_2$ , (b) NT-1, (c) NT-2 and, (d) NT-3 sample.

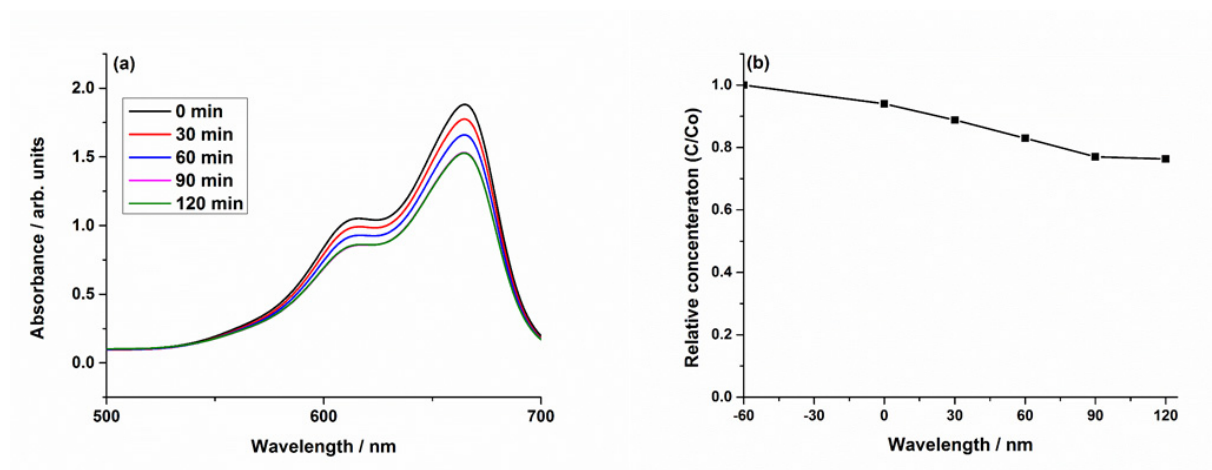

Figure S2. (a) UV Vis absorption spectra for the dye degradation employing standard  $\text{TiO}_2$  P25 and (b) relative dye degradation curve.

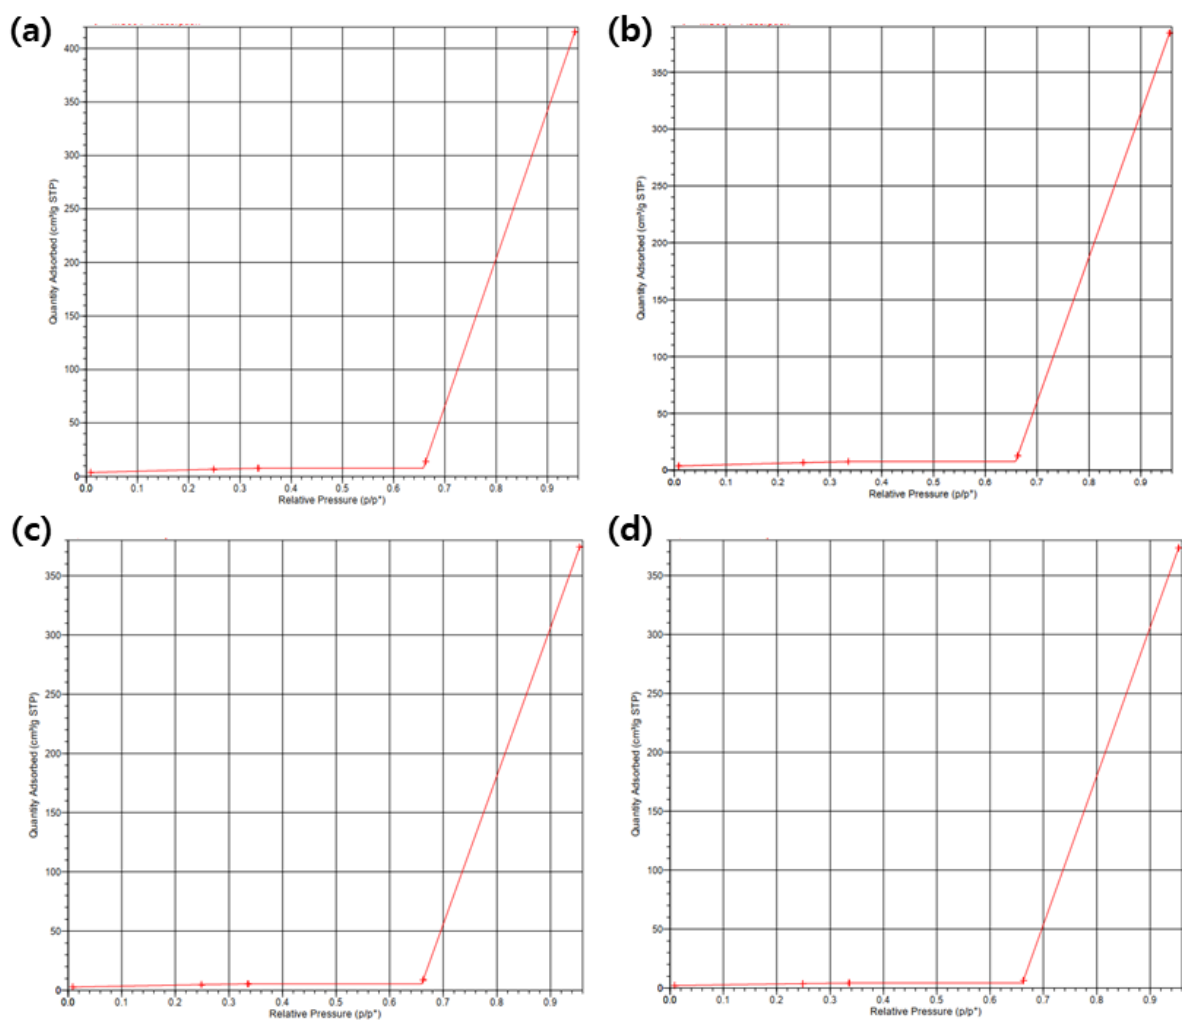

Figure S3. Adsorption Isotherm linear plostr for (a) Pure TiO<sub>2</sub>, (b) NT-1, (c) NT-2 and, (d) NT-3 samples.
